1 A Rab GTPase protein FvSec4 is necessary for fumonisin B1 biosynthesis and virulence in  
2 *Fusarium verticillioides*

3

4 Huijuan Yan, Jun Huang<sup>a</sup>, Huan Zhang<sup>b</sup> and Won Bo Shim \*

5

6 <sup>1</sup>Department of Plant Pathology and Microbiology, Texas A&M University, College Station 77843,

7 TX, USA

8

9 Current affiliation;

10 <sup>a</sup> Department of Plant Pathology, Kansas State University, Manhattan, 66506, KS, USA

11 <sup>b</sup> Department of Biology, Texas A&M University, College Station 77843, TX, USA

12

13 \* Corresponding author: Won Bo Shim, Email: [wbshim@tamu.edu](mailto:wbshim@tamu.edu)

14

15

16

17 **Abstract**

18

19 Rab GTPases are responsible for a variety of membrane trafficking and vesicular transportation in  
20 fungi. But the role of Rab GTPases in *Fusarium verticillioides*, one of the key corn pathogens  
21 worldwide, remains elusive. These Small GTPases in fungi, particularly those homologous to  
22 *Saccharomyces cerevisiae* Sec4, are known to be associated with protein secretion, vesicular  
23 trafficking, secondary metabolism and pathogenicity. Here, we characterized the molecular  
24 functions of FvSec4 by generating a null mutant and learned that it is important for vegetative  
25 growth, hyphal branching, and conidiation. Interestingly, the mutation did not impair the  
26 expression of key conidiation-related genes. Meanwhile, the mutant did not show any defect in  
27 sexual development, including perithecia production. GFP-FvSec4 localized to growing hyphal  
28 tips, and raised the possibility that FvSec4 is involved in protein trafficking and endocytosis. The  
29 mutant exhibited defect in corn stalk rot virulence and also significant alteration of fumonisin B1  
30 production. The mutation led to more sensitivity to oxidative and cell wall stress agents, and  
31 defects in carbon utilization. Gene complementation fully restored the defects in the mutant  
32 demonstrating that FvSec4 plays important role in these functions. Taken together, our data  
33 indicate that FvSec4 plays important roles in *F. verticillioides* hyphal development, virulence,  
34 mycotoxin production and stresses response. Further study is needed to characterize whether the  
35 mutation in FvSec4 leads to altered vesicle trafficking and protein secretion, which ultimately  
36 impact *F. verticillioides* physiology and virulence.

37

38 **Key Words:** *Fusarium verticillioides*, Rab GTPase, Sec4, fumonisin B1, virulence

## 39 1. Introduction

40

41 Eukaryotic cells employ exocytosis and endocytosis to ensure proper cell physiology while  
42 interacting with ambient environment ([Schultzhaus and Shaw 2015](#)). Vesicles mediate protein  
43 transport during exo- and endocytosis ([Lazar, et al. 1997](#)), and Rab GTPases play important roles  
44 in each transport step ([Lazar, et al. 1997](#)). This protein family, the largest subfamily of Ras  
45 superfamily, is involved in vesicular trafficking regulation in eukaryotes by cycling between  
46 inactive (GDP-bound) and active (GTP-bound) states ([Novick 2016](#)). In *Saccharomyces*  
47 *cerevisiae*, 11 members of Rab GTPases have been identified and studied ([Lazar, et al. 1997](#)). Sec4  
48 was first identified in *S. cerevisiae* which was shown to be involved in both secretory vesicles and  
49 the plasma membrane ([Salminen and Novick 1987](#); [Goud, et al. 1988](#)). A recent study also  
50 demonstrated that Sec4 is associated with the actin patches and endocytic internalization in yeast  
51 ([Johansen, et al. 2016](#)).

52

53 In host-pathogen interactions, pathogenic fungi such as *Fusarium* species utilize many virulence  
54 factors including cell-wall degrading enzymes, effectors and toxins by secreting these into the  
55 extracellular space or the host cytoplasm to trigger a variety of responses in the host ([Ma, et al.](#)  
56 [2013](#)). Thus, it is reasonable to anticipate that exocyst complex plays an important role in fungal  
57 pathogenesis ([Chen, et al. 2015](#)). And Sec4 is a crucial component during this process which is  
58 responsible for the transport of post-Golgi-derived secretory vesicles to the cell membrane  
59 ([Salminen and Novick 1987](#)). In pathogenic fungi, a number of studies have shown that Sec4 is  
60 associated with various cellular functions important for virulence. *CLPT1* in *Colletotrichum*  
61 *lindemuthianum* was the first Sec4-like Rab GTPase gene reported in a phytopathogenic fungus  
62 associated with intracellular vesicular trafficking ([Dumas, et al. 2001](#)). Later, *CLPT1* was further

63 demonstrated to be required for protein secretion and fungal pathogenicity ([Siriputthaiwan, et al.](#)  
64 [2005](#)). In *Aspergillus fumigatus*, Sec4 homolog SrgA was shown to be involved in stress response,  
65 virulence and phenotypic heterogeneity ([Powers-Fletcher, et al. 2013](#)). *Magnaporthe oryzae*  
66 MoSec4 mutant exhibited defects in extracellular proteins secretion and consequently hyphal  
67 development and pathogenicity in the rice blast fungus ([Zheng, et al. 2016](#)).

68  
69 *Fusarium verticillioides* (teleomorph *Gibberella moniliformis* Wineland) is a fungal pathogen of  
70 corn causing ear rot and stalk rot, posing significant food safety and security risks. The fungus is  
71 a heterothallic ascomycete, but predominantly utilizes asexual spores, *i.e.* macroconidia and  
72 microconidia, to rapidly reproduce on infected seeds and plant debris ([Leslie and Summerell](#)  
73 [2008](#)). Most importantly, the fungus can produce various mycotoxins and biologically active  
74 metabolites including fusaric acid, fusarins, and fumonisins on infested corn ears. Fumonisin B1  
75 (FB1) is the most prevalent and toxic form of fumonisins, a group of polyketide-derived  
76 mycotoxins structurally similar to sphinganine, and this mycotoxin is linked to devastating health  
77 risks in humans and animals, including esophageal cancer and neural tube defect ([Alexander, et](#)  
78 [al. 2009](#); [Wu, et al. 2014](#)). Fumonisin biosynthesis gene cluster, also referred to as the *FUM* cluster,  
79 was first discovered by Proctor et al (1999). The cluster consists of a series of key genes encoding  
80 biosynthetic enzymes and regulatory proteins ([Alexander, et al. 2009](#)), and molecular  
81 characterization of *FUM1*, a polyketide synthase (PKS) gene, and *FUM8*, an aminotransferase  
82 gene, showed their important roles in FB1 biosynthesis. FB1 production was significantly reduced  
83 in *fum1* and *fum8* knockout mutants suggesting that these two key genes in the *FUM* cluster are  
84 critical for fumonisin biosynthesis ([Proctor, et al. 1999](#); [Seo, et al. 2001](#)).

85  
86 However, the regulatory mechanisms involved transport and secretion of FB1 in *F. verticillioides*

87 remain obscure. But it is reasonable to hypothesize that key mycotoxigenic fungi employ similar  
88 mechanisms ([Woloshuk and Shim 2013](#)). A study performed in *Aspergillus parasiticus* described  
89 how vesicles, not vacuoles, are primarily associated with aflatoxin biosynthesis and export  
90 ([Chanda, et al. 2009](#)). The study also illustrated the development of mycotoxigenic vesicles under  
91 conditions conducive to mycotoxin biosynthesis. A follow-up study also demonstrated that these  
92 mycotoxigenic vesicles fuse with the cytoplasmic membrane to secrete and export aflatoxin  
93 ([Chanda, et al. 2010](#)). Exocytosis relies on a exocyst complex which has eight proteins, including  
94 Exo70p, Exo84p, Sec3p, Sec5p, Sec6p, Sec8p, Sec10p and Sec15p ([TerBush, et al. 1996](#); [Chen,](#)  
95 [et al. 2015](#)). And Sec4 was recognized as the key component regulating the exocyst assembly  
96 ([Guo, et al. 1999](#)). We hypothesize that Sec4-like Rab GTPases in *F. verticillioides* FB1 is  
97 important for FB1 synthesis and transport. To test this, we identified a *S. cerevisiae* Sec4 homolog  
98 FvSec4 and characterized its role in *F. verticillioides* vegetative growth, virulence and FB1  
99 biosynthesis.

100

## 101 **2. Material and methods**

102

### 103 2.1 Fungal strains, culture media and growth conditions

104

105 *F. verticillioides* strain 7600 was used as the wild-type strains in this study ([Zhang, et al. 2018](#)).

106 All strains were grown and evaluated on V8 juice agar (200 ml of V8 juice, 3 g of CaCO<sub>3</sub> and 20

107 g of agar powder per liter), potato dextrose agar (PDA, Difco) and myro agar (1g of NH<sub>4</sub>H<sub>2</sub>PO<sub>4</sub>, 3

108 g of KH<sub>2</sub>PO<sub>4</sub>, 2 g of MgSO<sub>4</sub>·7H<sub>2</sub>O, 5 g of NaCl, 40 g of sucrose and 20 g of agar powder per liter)

109 at room temperature for 8 days. For the spore production, 5 ml sterile water was added into 8 days

110 old V8 agar plates. Spore suspensions were harvested by passing through miracloth (EMD

111 Millipore) and counted using the hemocytometer. Newly harvested microconidia were suspended  
112 in 0.2x potato dextrose broth (PDB) for 5h and 6.5 h with gentle shaking to assay spore  
113 germinations. For genomic DNA extraction, strains were grown in YEPD liquid medium (3 g yeast  
114 extract, 10 g peptone and 20 g dextrose per liter) at 25 °C in a rotatory shaker for 4 days. For stress  
115 assays, strains were cultured on Czapek-Dox agar (2 g/L NaNO<sub>3</sub>, 0.5 g/L MgSO<sub>4</sub>-7H<sub>2</sub>O, 0.5 g/L  
116 KCl, 10 mg/L 14 FeSO<sub>4</sub>-7H<sub>2</sub>O, and 1 g/L K<sub>2</sub>HPO<sub>4</sub>, PH 7) amended with 70 mg/L Congo red, 2  
117 mmol/L H<sub>2</sub>O<sub>2</sub> or 0.01% SDS. For carbon utilization assay, 4 µl of 1 × 10<sup>6</sup> conidial suspension was  
118 inoculated on the center of Czapek-Dox agar plates with four different carbon sources, *i.e.* sucrose  
119 (30 g/L), dextrose (10 g/L), fructose (10 g/L) and sorbitol(91 g/L), and incubating 8 days at room  
120 temperature. For the mating study, conidia from wild-type, ΔFvsec4, ΔFvsec4-com strains were  
121 harvested from culture grown on V8 agar for 7 days, and subsequently spread onto *F.*  
122 *verticillioides* strain 7598, which was grown on carrot plates following our standard protocol  
123 ([Sagaram and Shim 2007](#)).

124

## 125 2.2 Gene deletion and complementation, polymerase chain reaction (PCR), and transformation

126

127 The constructs for *F. verticillioides* transformation were generated following our laboratory  
128 standard procedures ([Sagaram and Shim 2007](#)). Briefly, DNA fragments corresponding to 5' and  
129 3' flanking regions of the gene were amplified from the wild-type genomic DNA. Meanwhile,  
130 hygromycin B phosphotransferase (*HPH*) gene in pBP15 plasmid was used to obtain the HP and  
131 PH fragments. 5' and 3' flanking region fragments were fused with PH and HP fragments by  
132 single-joint PCR respectively ([Yu, et al. 2004](#); [Sagaram and Shim 2007](#)). We used protoplast  
133 preparation and transformation protocols previous described in Zhang et al (2018). We used PCR  
134 to verify targeted gene deletion mutations using primers OF/OR, UAF/YG/F, UAR/GE/R (Table

135 S1), followed by Southern blot and qPCR for further validation.

136

137 For gene complementation, wild-type *FvSEC4* gene with its native promoter was co-transformed  
138 with a geneticin-resistant gene (*GEN*) into mutant protoplasts. All transformants were screened by  
139 PCR. All primers used in this study are presented in Table S1. To construct the GFP-FvSec4  
140 plasmid, *FvSEC4* coding region from *F. verticillioides* cDNA was amplified. *FvSEC4* native  
141 promoter and terminator were amplified from wild-type DNA. GFP was amplified from PKNTG  
142 plasmid (Dr. Wenhui Zheng, Fujian Agriculture and Forestry University, China). These four  
143 purified products were introduced to the *HindIII* and *BamHI* sites of PKNTG using In-Fusion-HD  
144 cloning kit (Takara Bio USA). The plasmid was then sequenced and introduced into the  $\Delta Fvsec4$   
145 strain for genetic complementation and localization study.

146

147 2.3 Nucleic acid manipulation and Southern blot

148

149 Bacterial plasmid DNA was isolated with Wizard miniprep DNA purification system (Promega).  
150 Fungal genomic DNA isolation and Southern blot analysis were performed following standard  
151 procedures ([Sambrook 2001](#)). Briefly, 10  $\mu$ g genomic DNA of each strain was completely digested  
152 with *ClaI* and probed with a  $^{32}$ P-labelled DNA fragment amplified from *F. verticillioides* genomic  
153 DNA with primers FvAF1 and FvAR1 (Table S1).

154

155 2.4 Corn infection and fumonisin B1 assays

156

157 Infection assays on corn seedling were conducted as previously described with minor  
158 modifications ([Kim, et al. 2018](#)). In this study, we used silver queen hybrid seeds (Burpee) for

159 seedling inoculation with fungal spore suspension. The seedlings were collected and analyzed after  
160 a one-week growth period in the dark room. At least three biological and three technical replicates  
161 were performed for each fungal strain.

162  
163 For FB1 and ergosterol extraction, four silver queen seeds were surface sterilized using the method  
164 previously described ([Christensen, et al. 2012](#)) with a minor modification. Sodium hypochlorite  
165 (6%) was replaced with 10% bleach. Next, sterilized kernels were put on autoclaved 90-mm  
166 Whatman filter paper. A scalpel was used to create wounds on the endosperm area, and these seeds  
167 were placed in 40-ml borosilicate glass vials. Fungal spore suspensions (200  $\mu$ l,  $10^7$ /ml) were  
168 inoculated into each vial, and these samples were incubated in room temperature for 7 days. FB1  
169 extraction and sample purification methods were described previously ([Christensen, et al. 2012](#)).  
170 HPLC analyses of FB1 and ergosterol were performed as described ([Shim and Woloshuk 1999](#)).  
171 FB1 levels were then normalized to ergosterol contents. The experiment was repeated twice with  
172 three biological replicates.

173  
174 2.5 RNA extraction and gene expression study

175  
176 A 1ml fungal spore suspension ( $10^6$  spores/ml) was inoculated in 100 ml YEPD for 3 days at room  
177 temperature with agitation (150 rpm). Then, mycelium from each flask was filtered through  
178 Miracloth and weighed (0.3 g) before transferred to 100 ml myro liquid medium. Samples were  
179 collected after 7 days incubation at room temperature with agitation (150 rpm). In addition, 2 ml  
180 of spore suspension ( $10^6$  spores/ml) were added into 100 ml YEPD, incubated for 20 h at 28°C at  
181 150rpm before being harvested for RNA extraction for qPCR assay. Three replicates were  
182 performed for each strain. Total RNA was extracted using Qiagen kit following the manufacturers'



183 protocols. RNA samples were converted into cDNA using the Verso cDNA synthesis kit (Thermo  
184 Fisher Scientific), and qPCR analyses were performed with Step One plus real-time PCR system  
185 using the DyNAmo ColorFlash SYBR Green qPCR Kit (Thermo Fisher Scientific) with 0.5  
186  $\mu$ l cDNA as the template in per 10  $\mu$ l reaction. Expression levels were normalized with *F.*  
187 *verticillioides*  $\beta$ -tubulin-encoding gene (FVEG\_04081).

188

## 189 2.6 Microscopy and staining protocol

190

191 For hyphal growth imaging, strains were cultivated on 0.2xPDA for three days, and a block of agar  
192 containing the growing edge (approximately 1 cm diameter) was cut and placed on a glass slide.  
193 Next, water (10  $\mu$ l) was added on the agar block, and subsequently a coverslip was gently placed  
194 on top. We incubated the sample at 28°C for additional 20 mins, and then observed hyphal growth  
195 under a microscope (Olympus BX60). For GFP assay, we followed a previous method with minor  
196 modifications ([Schultzhaus, et al. 2015](#)) and with assistance from Dr. Brian Shaw (Department of  
197 Plant Pathology and Microbiology, TAMU). We used 16-18 h hypha to take images and water was  
198 added on the top of agar. Samples were incubated at 28°C for 20 mins. For FM4-64 staining, 16-  
199 18h growth of strains in 0.2xPDA were cut and put in the slide. Then, we added 10  $\mu$ l of 5  $\mu$ M  
200 FM4-64 on top of medium and incubated at room temperature for 10 mins. We used 0.2xPDB  
201 broth to wash samples twice before taking images. Images were prepared using ImageJ software  
202 ([Schneider, et al. 2012](#)).

203

## 204 3. Results

205

### 206 3.1 Identification of the Sec4 homolog in *F. verticillioides*

207  
208 We used the Sec4 protein sequence from the *S. cerevisiae* genome database  
209 (<http://www.yeastgenome.org/>) to conduct a search into NCBI *F. verticillioides* database. This  
210 search identified FVEG\_06175 locus, a 990-bp gene encoding a putative 203-amino-acid protein,  
211 which was designated as *FvSEC4* gene. To identify Sec4 homolog in other fungal species, the  
212 predicted FvSec4 amino acid sequence from the *F. verticillioides* genome database was used for  
213 our BLAST search. Multiple sequences alignment (Fig. 1) and phylogenetic analyses (Fig. S1A)  
214 indicated that Sec4-like proteins share high amino acid identity in fungi, such as *S. cerevisiae* Sec4  
215 (YFL005W, 64 % identity), *A. fumigatus* AfSrgA (Afu4g04810, 87% identity), *M. oryzae* MoSec4  
216 (MGG\_06135, 88% identity), *C. lindemuthianum* CLPT1 (AJ272025, 95% identity) and *C.*  
217 *orbiculare* CoSec4 (Cob\_13201, 95% identity). The predicted ScSec4 protein structure was  
218 obtained from PDB (PDB ID: 1G16) and modified into alignment by ESPript ([Stroupe and](#)  
219 [Brunger 2000](#); [Robert and Gouet 2014](#)).

220  
221 3.2 Loss of FvSec4 impairs hyphal growth and conidiation

222  
223 To investigate the function of FvSec4, we generated deletion mutants by replacing the entire gene  
224 with a hygromycin-resistance marker (Fig. S2A). The gene-replacement mutants were confirmed  
225 by Southern blot (Fig. S2B). The wild-type strain showed a 2.4-kb hybridizing band and all three  
226 putative mutants had a 6.5-kb band, as expected when using the ORF 5' flanking probe for  
227 Southern blot (Fig. S2B). These results suggested that the three mutant strains had a single-copy  
228 insertion of the hygromycin-resistance marker and had no ectopic insertion events. We selected  
229 the first mutant, which was designated  $\Delta Fvsec4$ , to perform further experiments, including qPCR  
230 and phenotypic analyses in this study (Fig. S2C). We also generated a gene complementation strain

231  $\Delta Fvsec4$ -Com and a GFP-tagged complementation strain  $\Delta Fvsec4$ -GFP-FvSec4.

232

233 To study the role of FvSec4 protein in *F. verticillioides* vegetative growth, we cultivated wild-  
234 type,  $\Delta Fvsec4$ ,  $\Delta Fvsec4$ -Com and  $\Delta Fvsec4$ -GFP-FvSec4 strains on V8, 0.2xPDA, myro agar  
235 media. The  $\Delta Fvsec4$  mutant showed a drastic reduction in growth and less fluffy mycelia on all  
236 agar media tested. Both  $\Delta Fvsec4$ -Com and  $\Delta Fvsec4$ -GFP-FvSec4 strains exhibited full recovery  
237 of growth defects (Fig. 2A). Moreover,  $\Delta Fvsec4$  displayed hyphal hyperbranching under  
238 microscopic examination (Fig. 2B). In addition,  $\Delta Fvsec4$  mutant produced significantly lower  
239 quantity of conidia when compared with wild-type and complemented strains (Fig. 3A). However,  
240 conidia germination rate in the mutant and wild-type did not show a significant difference when  
241 all strains were cultivated in 0.2xPDB liquid culture (Fig. 3B). Also, mycelial fresh weight did not  
242 differ between wild-type and mutants after growing in YEPD liquid medium for 3 days (Fig. 3C).

243

244 To further characterize the basis for conidia production deficiency in  $\Delta Fvsec4$ , we used qPCR to  
245 test transcription levels of key conidia regulation genes, including *BRLA*, *WETA*, *ABAA* and *STUA*.  
246 Total RNA samples were extracted from strains cultured in myro broth for 7 days and in YEPD  
247 broth for 20 h. The qPCR data suggested that conidia regulation genes are not impacted by the  
248 FvSec4 deletion both in myro and YEPD culture, except *ABAA* expression that showed 40%  
249 reduction when the mutant was cultured in myro broth (Fig. S3C and 3D). We also tested whether  
250 FvSec4 is important for sexual reproduction, but all strains showed no defect perithecia production  
251 (Fig. S3E).

252

253 3.3 Subcellular localization of FvSec4 suggests its role in vesicle trafficking

254

255 Since Sec4 is known as a key component that regulates the exocyst assembly, we studied the  
256 localization of FvSec4 in *F. verticillioides*. We used the native promoter and fused GFP to the N-  
257 terminus of *FvSEC4* coding sequence, and subsequently transformed the *FvSec4<sub>pro</sub>-GFP-FvSec4*  
258 construct into  $\Delta Fvsec4$  strain. After confirming construct insertion through PCR, we performed a  
259 live-cell imaging study of GFP-FvSec4 protein subcellular localization. The FvSec4 green  
260 fluorescent signal accumulated mainly in the tips of hyphal, which was consistent with the  
261 predicted Sec4 protein role in the tip vesicle transport and growth (Fig. 4A).

262  
263 In addition to exocytosis, a previous study revealed that Sec4 is also important for endocytosis  
264 ([Kean, et al. 1993](#)). To further test whether FvSec4 is associated with endocytosis, we stained the  
265 mycelia of wild-type,  $\Delta Fvsec4$ , and  $\Delta Fvsec4$ -Com with FM4-64, which is frequently used to study  
266 endocytosis and vesicle trafficking in the fungal hyphae ([Fischer-Parton, et al. 2000](#)). Strong  
267 fluorescent signals were detected in the Spitzenkörper region in both WT and  $\Delta Fvsec4$ -Com, while  
268 the  $\Delta Fvsec4$  mutant showed a broader diffused staining at the mycelial tip. No Spitzenkörper  
269 structure staining was observed in  $\Delta Fvsec4$ . This result suggests that  $\Delta Fvsec4$  is either not properly  
270 functioning in the uptake of FM4-64 or defective in recycling dyes to hyphal tip by exocytosis  
271 (Fig. 4B).

272

273 3.4 FvSec4 is important for corn seedling rot virulence

274

275 To test whether FvSec4 plays a role in *F. verticillioides* virulence, we inoculated wild-type,  
276  $\Delta Fvsec4$ ,  $\Delta Fvsec4$ -Com spore suspensions, with sterilized distilled water as the negative control,  
277 on one-week-old corn (silver queen hybrid) seedlings. After one week of incubation, we observed  
278 significantly reduced rot symptoms in  $\Delta Fvsec4$  mutant when compared to the wild-type strain (Fig.

279 5A and 5B). Gene complementation strain  $\Delta$ Fvsec4-Com showed fully recovered stalk rot  
280 symptoms in our assay. These results demonstrated that FvSec4 plays an important role in *F.*  
281 *verticillioides* corn stalk rot virulence.

282

283 3.5 FvSec4 is essential for FB1 production

284

285 We tested FB1 production in *F. verticillioides* strains on both corn kernels (silver queen hybrid)  
286 and in myro liquid medium after one-week incubation. The  $\Delta$ Fvsec4 growth was reduced on corn  
287 kernels but not in myro liquid medium (Fig. 6A and S3B). When FB1 production was normalized  
288 to fungal growth, the results showed that  $\Delta$ Fvsec4 produces dramatically lower levels of FB1 than  
289 the wild-type progenitor in both growth conditions (Fig. 6B and 6C). To further understand how  
290 FvSec4 impacts FB1 production at the molecular level, we used qPCR to study the expression of  
291 two key FUM cluster genes *FUM1* and *FUM8*. RNA samples were collected from 7 day-post-  
292 inoculation myro cultures. Both *FUM1* and *FUM8* expressions were significantly altered with  
293 three-fold reduction in  $\Delta$ Fvsec4 strain when compared to the wild-type and  $\Delta$ Fvsec4-Com (Fig.  
294 6D). Additionally, we also tested *SEC5*, *EXO70*, *SYN1* and *LCPI* gene expression in 7 day-post-  
295 inoculation myro and 20h YEPD liquid media. Our data showed selected genes associated with  
296 exocytosis were not altered but LCP1 transcription level was suppressed in the  $\Delta$ Fvsec4 deletion  
297 mutants (Fig. 6D and S3D). Taken together, our results indicate that FvSec4 is positively  
298 associated with key *FUM* gene expression and ultimately FB1 production.

299

300 3.6 FvSec4 plays an important role in response to various stressors and extracellular enzymes  
301 secretion

302

303 To investigate whether FvSec4 is involved in response to environment stress agents, we tested  
304 vegetative growth of strains on minimal media amended with SDS (cell wall stress), Congo red  
305 (cell wall stress) and H<sub>2</sub>O<sub>2</sub> (oxidative stress) (Fig. 7A). The mutant growth rate was significantly  
306 inhibited by these stress agents when compared to the wild-type strain, especially under the  
307 oxidative stress with H<sub>2</sub>O<sub>2</sub>. (Fig. 7B). This outcome suggests that FvSec4 plays a role in response  
308 to stress related to cell wall integrity and tolerance to oxidative stress.

309  
310 To determine if FvSec4 is important for utilization of different carbon nutrients, we cultivated  
311 wild-type,  $\Delta$ Fvsec4,  $\Delta$ Fvsec4-Com strains on Czapek-Dox agar medium containing different  
312 carbon sources, *i.e.* sucrose, dextrose, fructose and sorbitol (Fig. 7C). We learned that the mycelial  
313 growth of  $\Delta$ Fvsec4 mutant exhibits significant restriction when grown on Czapek-Dox agar  
314 containing dextrose or fructose but not sorbitol, when compared to the growth observed with  
315 sucrose as the sole carbon source (Fig. 7D). Further studies are needed to determine if this  
316 deficiency is due to carbon nutrient import into fungal cell or secretion defect in extracellular  
317 catabolic enzymes.

318

## 319 **Discussion**

320

321 Exocytosis plays important roles in diverse functions such as cell polarization, growth,  
322 morphology, and migration ([He and Guo 2009](#)). Exocytosis is responsible for the secretion of  
323 cellular substances to the extracellular space. When pathogenic fungi colonize the living plants,  
324 these organisms employ various strategies to adapt the host environment, namely by activating  
325 signaling pathways associated with producing effectors, secondary metabolites and enzymes ([van  
326 der Does and Rep 2017](#)). Previous studies indicate the Sec4 protein is a key regulator of multi-

327 subunit exocyst complex function ([Guo, et al. 1999](#)). Unlike in *S. cerevisiae* and *Candida albicans*,  
328 Sec4 protein does not appear to be essential for viability but its function is critical for other  
329 physiological functions in filamentous fungi ([Salminen and Novick 1987](#); [Mao, et al. 1999](#)). The  
330 deletion of FvSec4, a highly conserved Rab GTPase protein, showed that this protein is essential  
331 for the hyphal branching and growth, conidiation, stress responses and extracellular enzymes  
332 secretion in *F. verticillioides*. FvSec4 was also indispensable for the virulence and mycotoxin  
333 production.

334  
335 Similar to  $\Delta$ Mosec4 in *M. oryzae*, the virulence in  $\Delta$ Fvsec4 strain was significantly reduced in our  
336 seedling rot assay when compared with the wild-type progenitor. The reduced virulence in  
337  $\Delta$ Mosec4 was partially due to appressoria abnormalities, particularly with lower turgor pressure  
338 which is crucial for host penetration. Misshapen invasive hyphae and mislocalization of the  
339 cytoplasmic effector in  $\Delta$ Mosec4 mutant could have also negatively impacted virulence. Infection  
340 structure such as appressoria are not recognized in *F. verticillioides*. But it is also noteworthy that  
341 a mutation in a Sec4 homolog in wheat scab pathogen *F. graminearum*, a non-appressorium  
342 producing ascomycete, also led to a virulence defect ([Zheng, et al. 2015](#)). Furthermore, the deletion  
343 of Sec4 homolog BcSas1 in *Botrytis cinerea* also showed reduced virulence, and this outcome  
344 could perhaps be explained by reduced growth rate and inadequate secretion of cell wall degrading  
345 enzymes ([Zhang, et al. 2014](#)). While we cannot exclude slower vegetative growth as one of the  
346 factors for reduced virulence, we can also propose that FvSec4 is involved in regulating the  
347 expression of *F. verticillioides* secreted proteins. Consistent with this idea, we learned that the  
348 expression of *FvLCPI* gene was significantly decreased in  $\Delta$ Fvsec4. In our previous study, we  
349 characterized FvLcp1 as a secreted protein that is involved host defense suppression and FB1  
350 biosynthesis ([Zhang, et al. 2017](#)).

351  
352 Another possible reason for attenuated pathogenicity is due to the mutant exhibiting deficiencies  
353 in responding to various exogenously applied stress agents. In our study,  $\Delta Fvsec4$  showed  
354 increased sensitivity to  $H_2O_2$ . It is well studied that reactive oxygen species (ROS) are accumulated  
355 in plant hosts as a response to biotic and abiotic stress, and *Fusarium* species are directly causing  
356 biotic stress on corn ([Lehmann, et al. 2015](#)). However, there are contradicting studies that suggest  
357 ROS sensitivity may not be a key factor in fungal virulence. For instance, *B. cinerea* BcSas1  
358 deletion mutants showed less sensitivity when compared to the wild-type ([Zhang, et al. 2014](#)). In  
359 addition to ROS response,  $\Delta Fvsec4$  exhibited growth deficiencies when utilizing different carbon  
360 sources such as dextrose and fructose when compared to sucrose. This result raises a question  
361 whether FvSec4 is involved in secretion of enzymes important for specific carbon nutrient  
362 utilization. The hypersensitivity to  $H_2O_2$  and the impairment in carbon nutrient utilization are  
363 consistent with the attenuated virulence in  $\Delta Fvsec4$ . Published studies show that Sec4 Rab GTPase  
364 are important for stress response and nutrient utilization ([Zhang, et al. 2014](#); [Zheng, et al. 2016](#)).  
365 But, whether these two physiological processes are genetically linked needs further investigation.  
366  
367 Secondary metabolites are not required for conventional growth in *Fusarium* species but may offer  
368 advantages in certain circumstances ([Ma, et al. 2013](#)). However, it is clear that mycotoxins  
369 produced by fungi have adverse effects on human health and food safety ([Wu, et al. 2014](#)). There  
370 is an earlier study by Zheng et al (2015) describing how Rab GTPase FgRab8 and exocytosis are  
371 positively associated with *F. graminearum* mycotoxin DON production ([Zheng, et al. 2015](#)).  
372 While DON has been recognized as a virulence factor in *F. graminearum*, FB1 is not a critical  
373 factor for plant pathogenesis in *F. verticillioides* ([Proctor, et al. 1995](#); [Desjardins, et al. 2002](#)). In  
374 this study,  $\Delta Fvsec4$  showed a significantly lower levels of FB1 production when compared to the



375 wild-type strain, implying that this protein is critical for regulating mycotoxin biosynthesis. To  
376 further understand how FvSec4 is impacting FB1 production, we tested the expression of key FUM  
377 genes *FUM1* and *FUM8*. Our qPCR result showed that transcriptional expression of these two  
378 FUM genes were significantly suppressed in the mutant. It is reasonable to hypothesize that this  
379 Rab GTPase indirectly regulate transcriptional activities of FUM cluster through other  
380 transcription factors.

381  
382 Sec4 protein is known to control exocyst assembly and involved in secretion of vesicles. We  
383 confirmed that FvSec4 is localized to the hyphal tip area which is consistent with the exocytosis  
384 function. To investigate the role of FvSec4 in regulating the exocyst complex and other  
385 downstream components, we identified three Sec4 downstream genes, *EXO70*, *SEC5* and *SYN1*,  
386 to study their gene expression levels. We found that  $\Delta Fvsec4$  mutation is not crucial for exocyst-  
387 related gene expression except for *SEC5*, which showed 22% less expression when compared to  
388 wild-type progenitor after a 7-day incubation in myro medium. This outcome led us to conclude  
389 that Sec4 is not directly involved in the transcriptional regulation of its downstream genes  
390 associated with exocytosis.

391  
392 Spitzenkörper is a subcellular structure found at the fungal hyphal tip that is associated with polar  
393 growth ([Riquelme and Sanchez-Leon 2014](#)). A previous report also indicated that Spitzenkörper  
394 acts as a Vesicle Supply Center (VSC) where vesicles accumulate before being released to  
395 extracellular space ([Bartnicki-Garcia, et al. 1989](#)). We stained mycelia with FM4-64, and the result  
396 showed that our wild-type strain harbors a recognizable Spitzenkörper at the hyphal tip. However,  
397  $\Delta Fvsec4$  exhibited accumulated fluorescence in both apical and subapical areas while the  
398 Spitzenkörper was absent after the same staining treatment. When we consider the important role

399 of Spitzenkörper in delivering cell wall components to the sites of cell wall synthesis, perhaps this  
400 abnormal Spitzenkörper structure and distribution are impacting the response to SDS and congo  
401 red cell wall stress agents in  $\Delta Fvsec4$  ([Riquelme 2013](#)). The lack of Spitzenkörper is possibly due  
402 to  $\Delta Fvsec4$  showing a defect in maintaining the balance between exocytosis and endocytosis. We  
403 can further hypothesize that in the mutant insufficient number of vesicles are delivered to the  
404 hyphal tip, and perhaps this leads to a significantly slower vegetative growth and hyper-branching.

405

#### 406 **Acknowledgements**

407

408 We thank Dr. Brian Shaw, Ms. Blake Commer and Mr. Joe Vasselli (Department of Plant  
409 Pathology and Microbiology, Texas A&M University) for help and discussion in microscopy. This  
410 research was supported in part by the Agriculture and Food Research Initiative Competitive Grants  
411 Program Grant (2013-68004-20359) from the USDA National Institute of Food and Agriculture.  
412 The authors declare no conflict of interest.

413 **References**

414

415 Alexander NJ, Proctor RH, McCormick SP. 2009. Genes, gene clusters, and biosynthesis of  
416 trichothecenes and fumonisins in *Fusarium*. *Toxin reviews* 28:198-215.

417 Bartnicki-Garcia S, Hergert F, Gierz G. 1989. Computer simulation of fungal morphogenesis and  
418 the mathematical basis for hyphal (tip) growth. *Protoplasma* 153:46-57.

419 Chanda A, Roze LV, Kang S, Artymovich KA, Hicks GR, Raikhel NV, Calvo AM, Linz JE. 2009.  
420 A key role for vesicles in fungal secondary metabolism. *Proc Natl Acad Sci U S A*  
421 106:19533-19538.

422 Chanda A, Roze LV, Linz JE. 2010. A possible role for exocytosis in aflatoxin export in *Aspergillus*  
423 *parasiticus*. *Eukaryot Cell* 9:1724-1727.

424 Chen X, Ebbole DJ, Wang Z. 2015. The exocyst complex: delivery hub for morphogenesis and  
425 pathogenesis in filamentous fungi. *Curr Opin Plant Biol* 28:48-54.

426 Christensen S, Borrego E, Shim WB, Isakeit T, Kolomiets M. 2012. Quantification of fungal  
427 colonization, sporogenesis, and production of mycotoxins using kernel bioassays. *J Vis*  
428 *Exp.* 62: e3727.

429 Desjardins AE, Munkvold GP, Plattner RD, Proctor RH. 2002. FUM1-a gene required for  
430 fumonisin biosynthesis but not for maize ear rot and ear infection by *Gibberella*  
431 *moniliformis* in field tests. *Mol Plant Microbe Interact* 15:1157-1164.

432 Dumas B, Borel C, Herbert C, Maury J, Jacquet C, Balsse R, Esquerre-Tugaye MT. 2001.  
433 Molecular characterization of CLPT1, a SEC4-like Rab/GTPase of the phytopathogenic  
434 fungus *Colletotrichum lindemuthianum* which is regulated by the carbon source. *Gene*  
435 272:219-225.

436 Fischer-Parton S, Parton RM, Hickey PC, Dijksterhuis J, Atkinson HA, Read ND. 2000. Confocal  
437 microscopy of FM4-64 as a tool for analysing endocytosis and vesicle trafficking in living  
438 fungal hyphae. *J Microsc* 198:246-259.

439 Goud B, Salminen A, Walworth NC, Novick PJ. 1988. A GTP-binding protein required for  
440 secretion rapidly associates with secretory vesicles and the plasma-membrane in yeast. *Cell*  
441 53:753-768.

442 Guo W, Roth D, Walch-Solimena C, Novick P. 1999. The exocyst is an effector for Sec4p, targeting  
443 secretory vesicles to sites of exocytosis. *EMBO J* 18:1071-1080.

444

445

446  
447 He B, Guo W. 2009. The exocyst complex in polarized exocytosis. *Current Opinion in Cell Biology*  
448 21:537-542.

449 Johansen J, Alfaro G, Beh CT. 2016. Polarized Exocytosis Induces Compensatory Endocytosis by  
450 Sec4p-Regulated Cortical Actin Polymerization. *PLoS Biol* 14:e1002534.

451 Kean LS, Fuller RS, Nichols JW. 1993. Retrograde lipid traffic in yeast: identification of two  
452 distinct pathways for internalization of fluorescent-labeled phosphatidylcholine from the  
453 plasma membrane. *J Cell Biol* 123:1403-1419.

454 Kim MS, Zhang H, Yan H, Yoon B-J, Shim WB. 2018. Characterizing co-expression networks  
455 underpinning maize stalk rot virulence in *Fusarium verticillioides* through computational  
456 subnetwork module analyses. *Scientific Reports* 8:8310.

457 Lazar T, Gotte M, Gallwitz D. 1997. Vesicular transport: how many Ypt/Rab-GTPases make a  
458 eukaryotic cell? *Trends Biochem Sci* 22:468-472.

459 Lehmann S, Serrano M, L'Haridon F, Tjamos SE, Metraux JP. 2015. Reactive oxygen species and  
460 plant resistance to fungal pathogens. *Phytochemistry* 112:54-62.

461 Leslie JF, Summerell BA. 2008. *The Fusarium laboratory manual*: John Wiley & Sons.

462 Ma LJ, Geiser DM, Proctor RH, Rooney AP, O'Donnell K, Trail F, Gardiner DM, Manners JM,  
463 Kazan K. 2013. *Fusarium pathogenomics*. *Annu Rev Microbiol* 67:399-416.

464 Mao YX, Kalb VF, Wong B. 1999. Overexpression of a dominant-negative allele of SEC4 inhibits  
465 growth and protein secretion in *Candida albicans*. *Journal of Bacteriology* 181:7235-7242.

466 Novick P. 2016. Regulation of membrane traffic by Rab GEF and GAP cascades. *Small GTPases*  
467 7:252-256.

468 Powers-Fletcher MV, Feng X, Krishnan K, Askew DS. 2013. Deletion of the sec4 Homolog srgA  
469 from *Aspergillus fumigatus* is associated with an impaired stress response, attenuated  
470 virulence and phenotypic heterogeneity. *PLoS One* 8: e66741.

471 Proctor RH, Desjardins AE, Plattner RD, Hohn TM. 1999. A polyketide synthase gene required  
472 for biosynthesis of fumonisin mycotoxins in *Gibberella fujikuroi* mating population A.  
473 *Fungal Genet Biol* 27:100-112.

474 Proctor RH, Hohn TM, McCormick SP. 1995. Reduced virulence of *Gibberella zeae* caused by  
475 disruption of a trichothecene toxin biosynthetic gene. *Mol Plant Microbe Interact* 8:593-  
476 601.

477

- 478  
479 Riquelme M. 2013. Tip Growth in Filamentous Fungi: A Road Trip to the Apex. In: Gottesman S,  
480 editor. Annual Review of Microbiology, Vol 67. p. 587-609.
- 481 Riquelme M, Sanchez-Leon E. 2014. The Spitzenkorper: a choreographer of fungal growth and  
482 morphogenesis. Current Opinion in Microbiology 20:27-33.
- 483 Robert X, Gouet P. 2014. Deciphering key features in protein structures with the new ENDscript  
484 server. Nucleic Acids Res 42:W320-324.
- 485 Sagaram US, Shim WB. 2007. *Fusarium verticillioides* GBB1, a gene encoding heterotrimeric G  
486 protein beta subunit, is associated with fumonisin B biosynthesis and hyphal development  
487 but not with fungal virulence. Mol Plant Pathol 8:375-384.
- 488 Salminen A, Novick PJ. 1987. A ras-like protein is required for a post-golgi event in yeast secretion.  
489 Cell 49:527-538.
- 490 Sambrook JaR, D. W. 2001. Molecular cloning : a laboratory manual. Cold Spring Harbor, N.Y.:  
491 Cold Spring Harbor Laboratory press.
- 492 Schneider CA, Rasband WS, Eliceiri KW. 2012. NIH Image to ImageJ: 25 years of image analysis.  
493 Nat Methods 9:671-675.
- 494 Schultzhaus Z, Yan H, Shaw BD. 2015. Aspergillus nidulans flippase DnfA is cargo of the  
495 endocytic collar and plays complementary roles in growth and phosphatidylserine  
496 asymmetry with another flippase, DnfB. Mol Microbiol 97:18-32.
- 497 Schultzhaus ZS, Shaw BD. 2015. Endocytosis and exocytosis in hyphal growth. Fungal Biology  
498 Reviews 29:43-53.
- 499 Seo JA, Proctor RH, Plattner RD. 2001. Characterization of four clustered and coregulated genes  
500 associated with fumonisin biosynthesis in *Fusarium verticillioides*. Fungal Genet Biol  
501 34:155-165.
- 502 Shim WB, Woloshuk CP. 1999. Nitrogen repression of fumonisin B1 biosynthesis in *Gibberella*  
503 *fujikuroi*. FEMS Microbiol Lett 177:109-116.
- 504 Siriputthaiwan P, Jauneau A, Herbert C, Garcin D, Dumas B. 2005. Functional analysis of CLPT1,  
505 a Rab/GTPase required for protein secretion and pathogenesis in the plant fungal pathogen  
506 *Colletotrichum lindemuthianum*. Journal of Cell Science 118:323-329.
- 507 Stroupe C, Brunger AT. 2000. Crystal structures of a Rab protein in its inactive and active  
508 conformations. J Mol Biol 304:585-598.

- 509 TerBush DR, Maurice T, Roth D, Novick P. 1996. The Exocyst is a multiprotein complex required  
510 for exocytosis in *Saccharomyces cerevisiae*. *EMBO Journal* 15:6483-6494.
- 511 van der Does HC, Rep M. 2017. Adaptation to the host environment by plant-pathogenic fungi.  
512 *Annual Review of Phytopathology* 55:427-450.
- 513 Woloshuk CP, Shim WB. 2013. Aflatoxins, fumonisins, and trichothecenes: a convergence of  
514 knowledge. *FEMS Microbiol Rev* 37:94-109.
- 515 Wu F, Groopman JD, Pestka JJ. 2014. Public health impacts of foodborne mycotoxins. *Annu Rev*  
516 *Food Sci Technol* 5:351-372.
- 517 Yu JH, Hamari Z, Han KH, Seo JA, Reyes-Dominguez Y, Scazzocchio C. 2004. Double-joint PCR:  
518 a PCR-based molecular tool for gene manipulations in filamentous fungi. *Fungal Genet*  
519 *Biol* 41:973-981.
- 520 Zhang H, Kim M, Huang J, Shim W. 2017. FvLcp1, a novel LysM/Chitin-binding protein, is  
521 important for ear rot virulence and fumonisin biosynthesis. *Phytopathology* 107: S5. 87
- 522 Zhang H, Mukherjee M, Kim JE, Yu W, Shim WB. 2018. Fsr1, a striatin homologue, forms an  
523 endomembrane-associated complex that regulates virulence in the maize pathogen  
524 *Fusarium verticillioides*. *Mol Plant Pathol* 19:812-826.
- 525 Zhang Z, Qin G, Li B, Tian S. 2014. Knocking out Bcsa1 in *Botrytis cinerea* impacts growth,  
526 development, and secretion of extracellular proteins, which decreases virulence. *Molecular*  
527 *Plant-Microbe Interactions* 27:590-600.
- 528 Zheng H, Zheng W, Wu C, Yang J, Xi Y, Xie Q, Zhao X, Deng X, Lu G, Li G, et al. 2015. Rab  
529 GTPases are essential for membrane trafficking-dependent growth and pathogenicity in  
530 *Fusarium graminearum*. *Environmental Microbiology* 17:4580-4599.
- 531 Zheng HK, Chen SM, Chen XF, Liu SY, Dang X, Yang CD, Giraldo MC, Oliveira-Garcia E, Zhou  
532 J, Wang ZH, et al. 2016. The small GTPase MoSec4 is involved in vegetative development  
533 and pathogenicity by regulating the extracellular protein secretion in *Magnaporthe oryzae*.  
534 *Frontiers in Plant Science* 7.
- 535
- 536

537 **Figure legends**

538

539 **Fig. 1.** FvSec4 protein sharing high similarity with other fungal species. Protein sequence  
540 alignment of *S. cerevisiae* Sec4, *F. verticillioides* FvSec4, *A. fumigatus* AfSrgA, *M. oryzae*  
541 MoSec4. *C. lindemuthianum* CLPT1. White characters with black background and black  
542 characters in a box indicate identical and similar sequences, respectively. Sec4 is predicted to have  
543 six alpha helices and six beta strands.

544

545 **Fig. 2.** Vegetative growth of wild-type (WT),  $\Delta$ Fvsec4,  $\Delta$ Fvsec4-Com and  $\Delta$ Fvsec4-GFP-FvSec4  
546 (GFP) strains. (A) Strains were cultured on the V8, 0.2xPDA, myro agar plates for 8 days at room  
547 temperature. (B)  $\Delta$ Fvsec4 mutant enhanced hyphal branching compared to WT,  $\Delta$ Fvsec4-Com  
548 after 3 days on 0.2xPDA agar plates. Bar = 100  $\mu$ m

549

550 **Fig. 3.** Impacts of FvSec4 on conidia production (A) Conidia production in wild-type (WT),  
551  $\Delta$ Fvsec4,  $\Delta$ Fvsec4-Com strains were measured after incubation on V8 agar medium at room  
552 temperature for 8 days. (B) Conidia germination rate in WT,  $\Delta$ Fvsec4, and  $\Delta$ Fvsec4-Com on  
553 0.2xPDB were examined under microscope after 5 and 6.5h incubation with gently shaking. (C)  
554 Mycelium fresh weight were assayed after 3-day incubation in YEPD liquid medium. (D)  
555 Transcript differences of conidia-related genes in  $\Delta$ Fvsec4 were compared to WT and  $\Delta$ Fvsec4-  
556 Com strains. Three biological replicates were performed independently. Error bars in this study all  
557 represent the standard deviations for three replicates. Lowercase letters in this study on the bar top  
558 suggest significant differences among various strains. (Student T-test,  $P < 0.05$ ). All data in this  
559 study were analyzed by Prism software.

560

561 **Fig. 4.** FvSec4 protein localization assay. (A) GFP-Sec4 protein driven by its native promoter  
562 mainly localized to the apical area of growing hyphae. Bar = 5 $\mu$ m (B) Hyphal growth of wild-type  
563 (WT),  $\Delta$ Fvsec4,  $\Delta$ Fvsec4-Com were examined under a microscope after 10 min of FM4-64  
564 staining. The Spitzenkörper region in  $\Delta$ Fvsec4 was compared with WT and  $\Delta$ Fvsec4-Com. Bar =  
565 5 $\mu$ m

566  
567 **Fig. 5.** Role of FvSec4 in corn seedling rot severity. (A) We inoculated 10 $\mu$ l of wild-type (WT),  
568  $\Delta$ Fvsec4, and  $\Delta$ Fvsec4-Com spore suspension (10<sup>7</sup>/ml) on one-week old silver queen seedlings.  
569 Symptoms were observed after 7 days of incubation. (B) Lesion sizes were quantified using Image  
570 J.

571  
572 **Fig. 6.** Influence of FvSec4 in FB1 production and key FUM gene transcription. (A) Surface  
573 sterilized silver queen corn seeds were inoculated with wild-type (WT),  $\Delta$ Fvsec4,  $\Delta$ Fvsec4-Com  
574 and incubated for 7 days. Sterile water was used as a negative control. (B) FB1 and ergosterol were  
575 quantified by HPLC. Ergosterol level in each sample was used to normalize FB1 levels, thus  
576 resulting in relative FB1 production in corn seeds. (C) Myro liquid medium was inoculated with  
577 WT,  $\Delta$ Fvsec4, and  $\Delta$ Fvsec4-Com for 7 days at room temperature with agitation. FB1 levels were  
578 analyzed by HPLC. (D) Transcriptional analyses of key FUM genes, exocyst-related genes, and  
579 FvLcp1 in WT,  $\Delta$ Fvsec4,  $\Delta$ Fvsec4-Com after 7-day incubation in the myro liquid medium.  
580 Transcripts were normalized against WT gene expression. Three biological replicates were  
581 performed independently. Error bars in this study all represent the standard deviations for three  
582 replicates. Lowercase letters in this study on the bar top suggest significant differences among  
583 various strains.

584



585 **Fig. 7.** Susceptibility against cell wall stress agents and deficiency in carbon utilization in  $\Delta Fvsec4$   
586 mutant. (A) Strains were grown on Czapek-Dox agar amended with SDS, congo red and  $H_2O_2$  for  
587 8 days at room temperature. (B) Growth diameter of  $\Delta Fvsec4$ ,  $\Delta Fvsec4$ -Com were subjected to  
588 statistical analyses. The growth inhibition rate (%) was measured by (sucrose growth diameter -  
589 designated stress growth) / sucrose growth diameter x 100. (C) Strains were grown on modified  
590 Czapek-Dox with dextrose, fructose or sorbitol as the sole carbon source for 8 days at room  
591 temperature. Czapek-Dox agar plates with sucrose was used as a control. (D) Inhibition rate of  
592 strains grown on the media containing different carbon sources. Three replicates were used in this  
593 assay. The growth inhibition rate (%) was measured by (diameter of growth on sucrose - designated  
594 carbon growth) / diameter of growth on sucrose x 100.  
595

Fig. 1. Yan et al

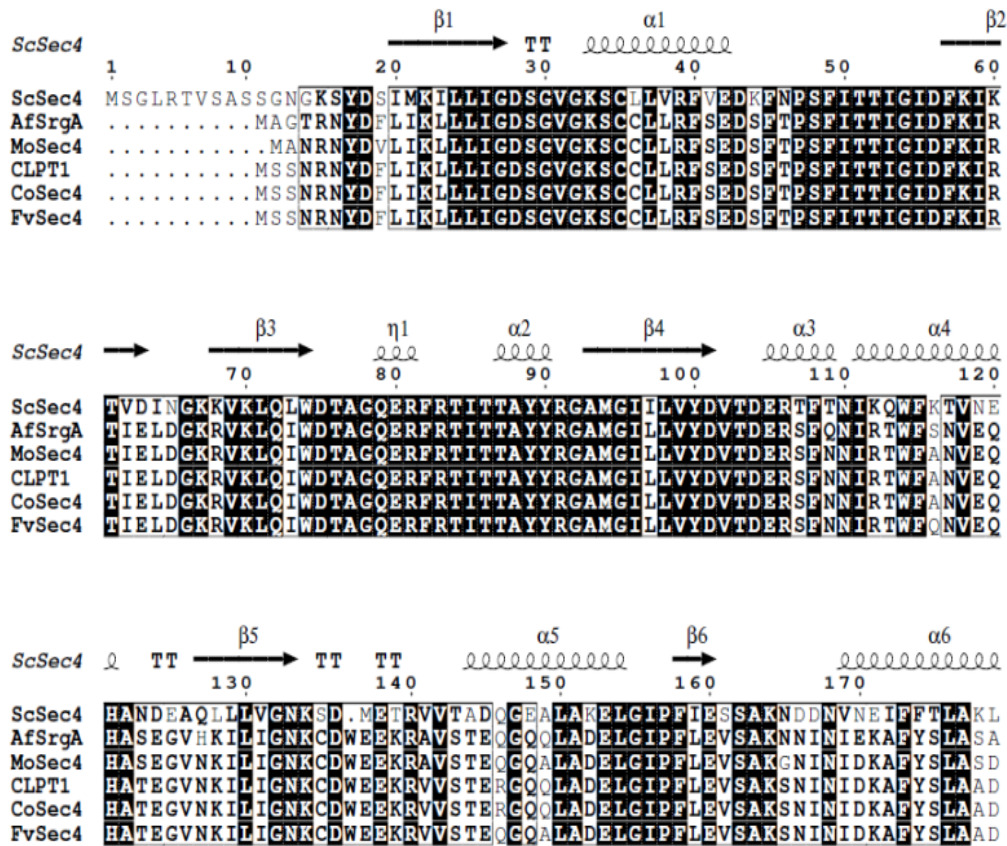

Fig. 2. Yan et al

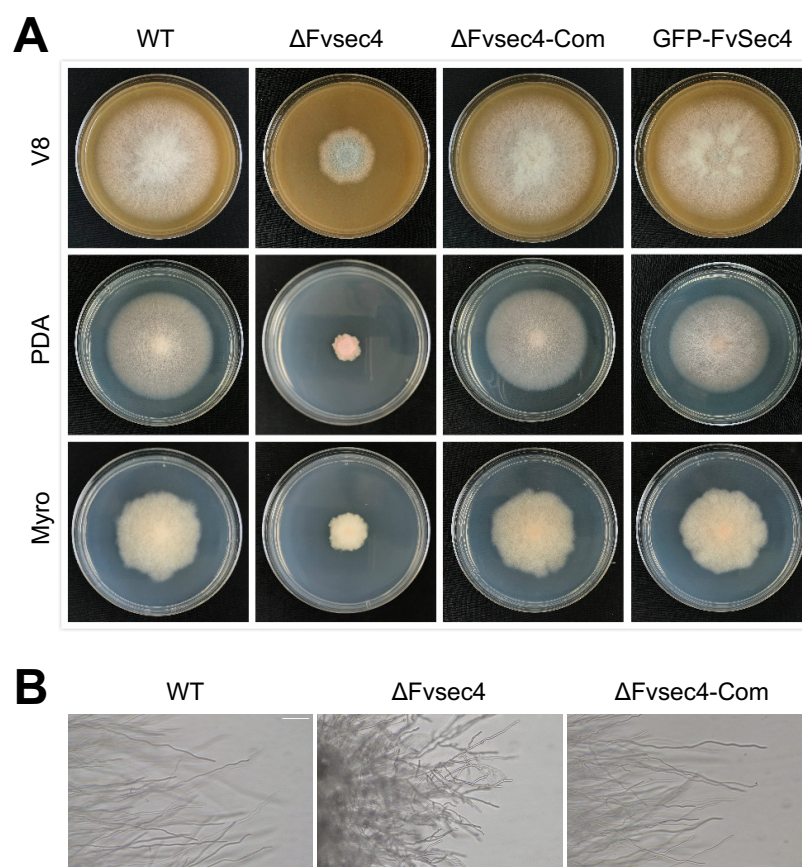

Fig. 3. Yan et al

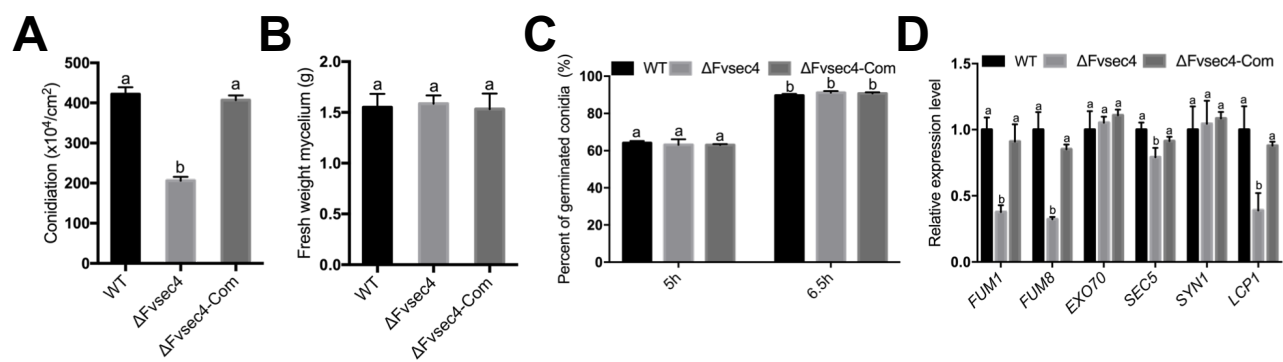

Fig. 4. Yan et al

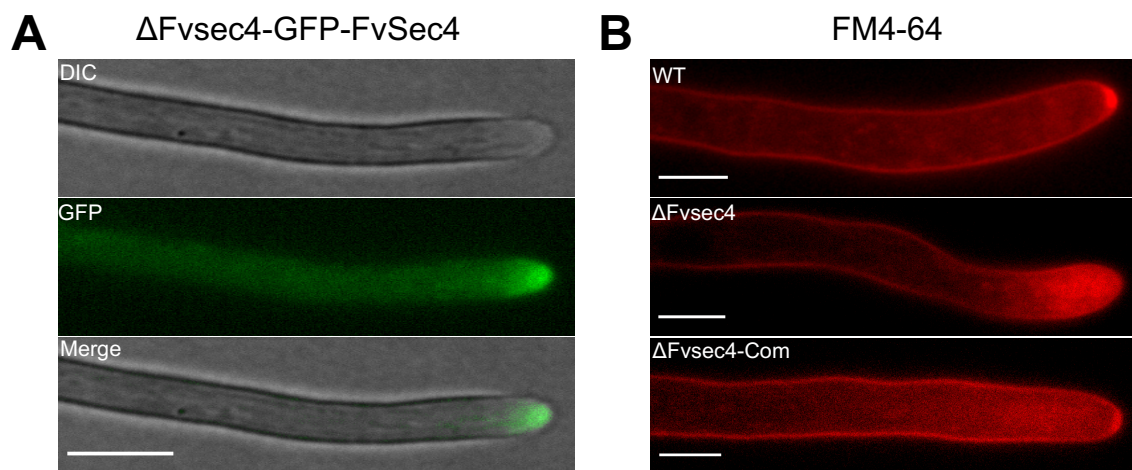

Fig. 5. Yan et al

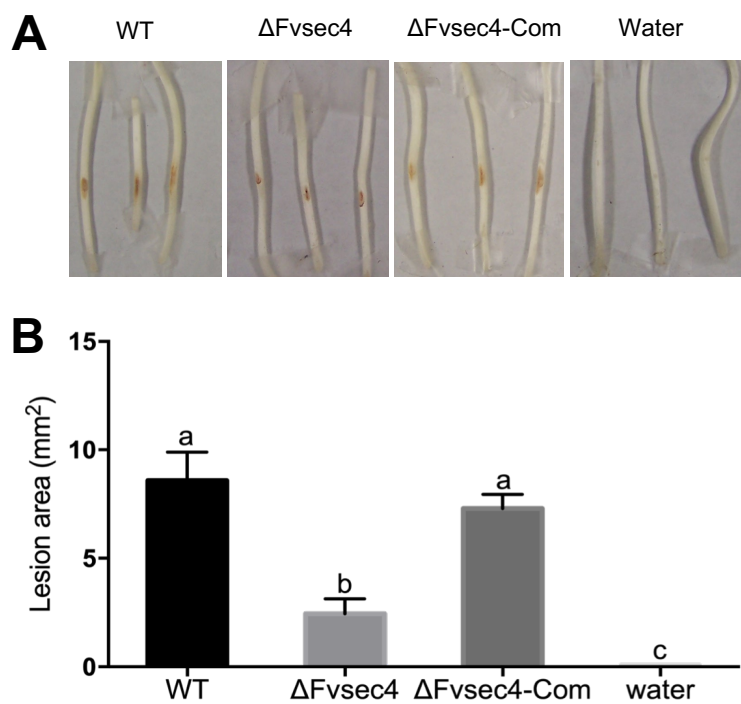

Fig. 6. Yan et al

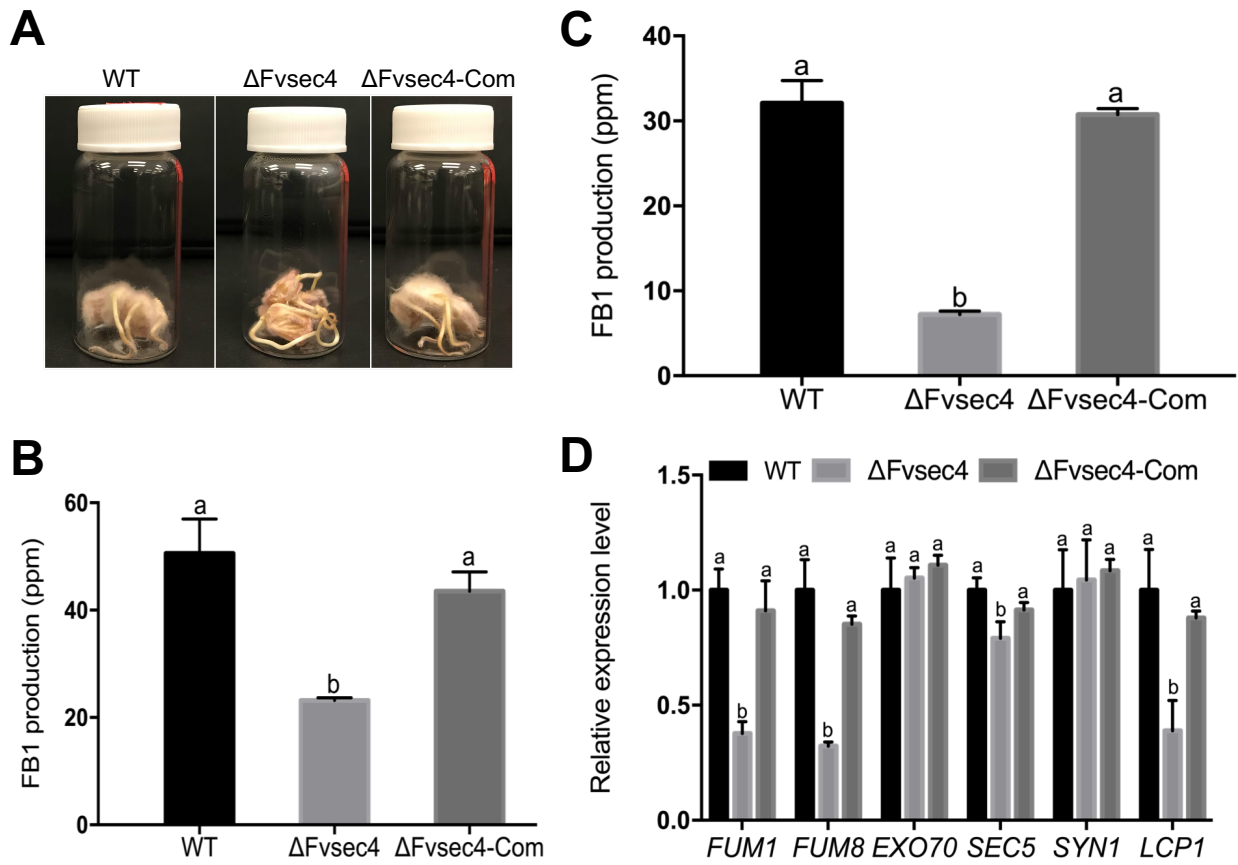

Fig. 7. Yan et al

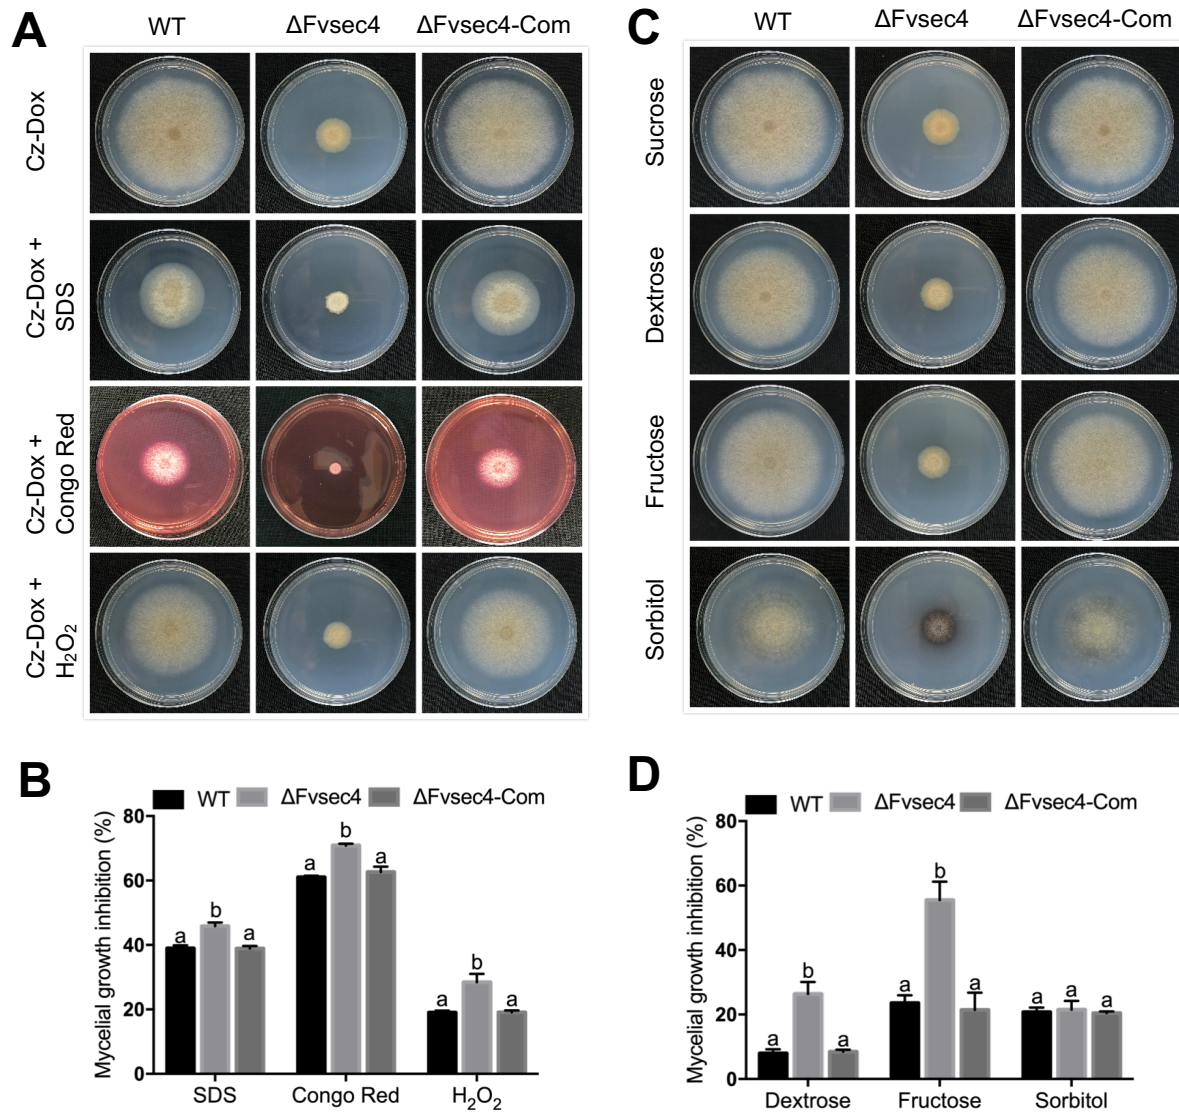



## Yan et al. Supplementary Information

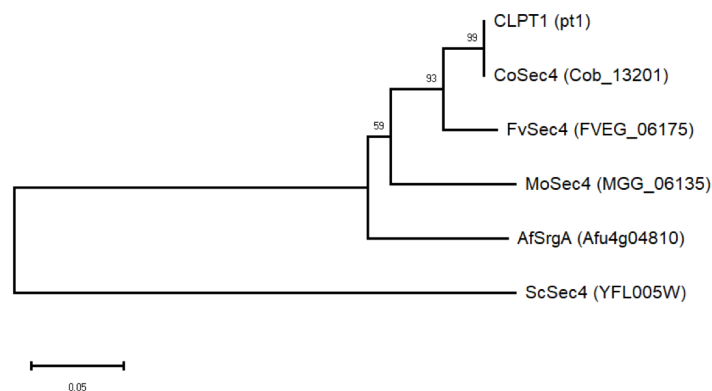

**Fig.S1.** (A) Phylogenetic analysis for FvSec4 and other Sec4 orthologs. Multiple sequences were aligned by ClusterX2. A neighbor-joining tree was constructed by MEGAX. The number at nodes indicates the percentage of replicate trees clustered together in 1000 bootstrap replications.

Yan et al. Supplementary Information

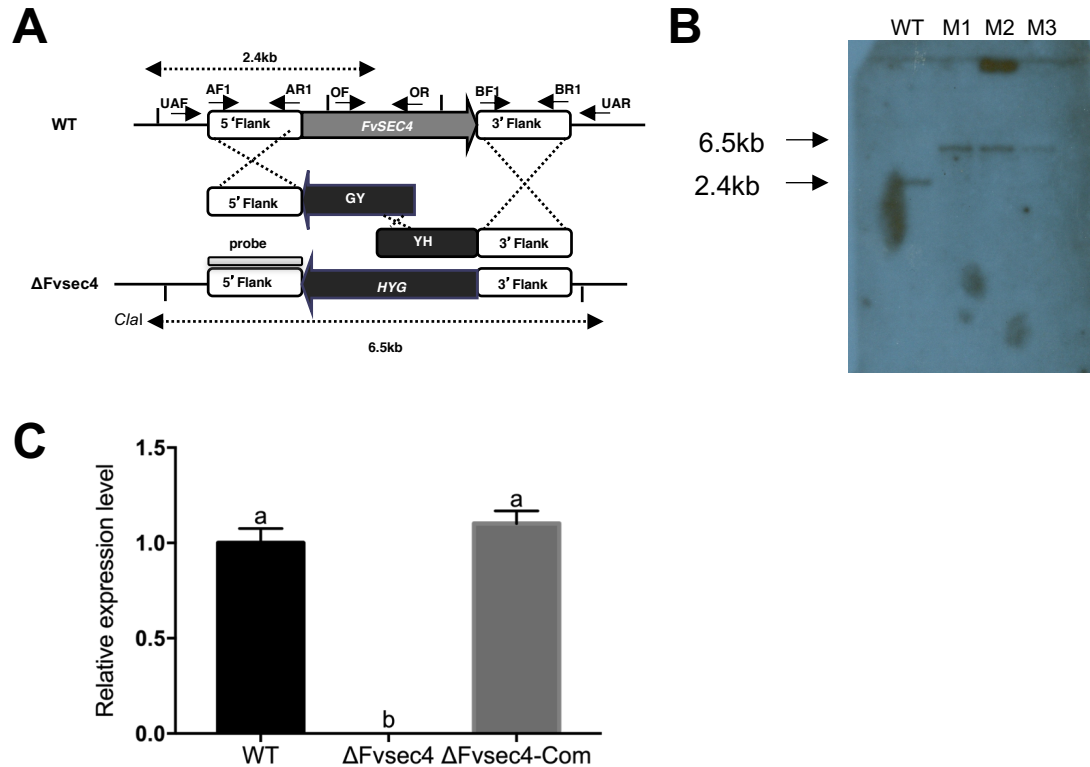

**Fig.S2.** (A) Homologous gene recombination approach used to construct  $\Delta Fvsec4$  mutant in *F. verticillioides*. (B) Southern blot analyses of WT and three knockout candidates (M1, M2, M3). M1 was used in this study as  $\Delta Fvsec4$ . We used the 5'-flanking regions as a probe for Southern blot. (C) WT,  $\Delta Fvsec4$  and  $\Delta Fvsec4$ -Com total RNAs were isolated after 7 days in myro liquid medium and reversed to cDNA. qPCR was employed to verify the  $\Delta Fvsec4$  and  $\Delta Fvsec4$ -Com using a *FvSEC4* gene-specific primer set while WT was as a control. No detectable *FvSec4* transcript in the  $\Delta Fvsec4$  mutant by qPCR analysis and  $\Delta Fvsec4$ -Com fully recover the *FvSEC4* expression.

Yan et al. Supplementary Information

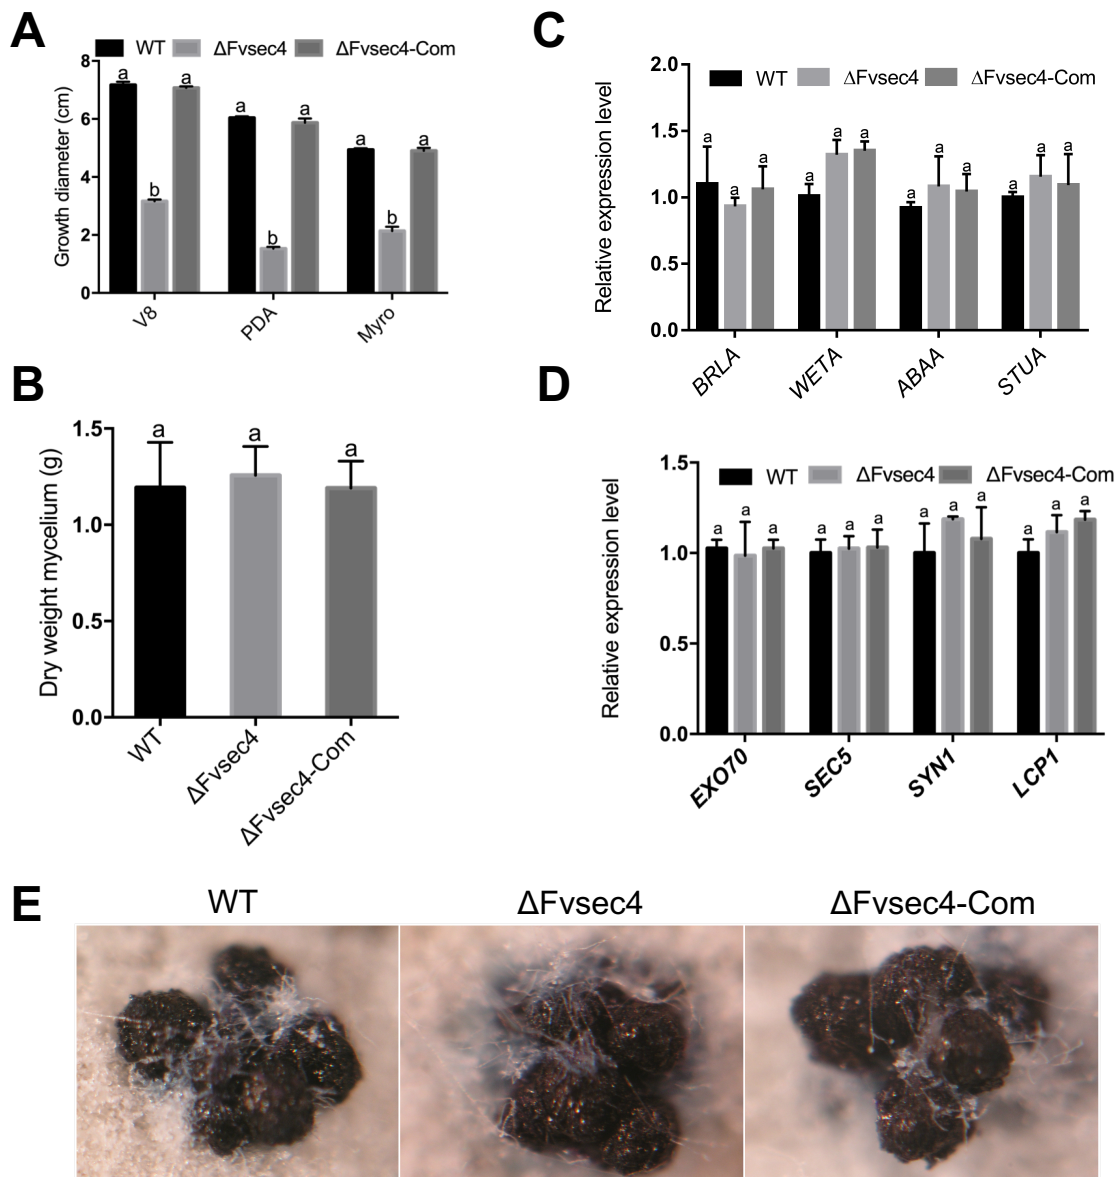

**Fig.S3.** Involvement of FvSec4 the vegetative growth but not perithecia in sexual mating. (A) Mycelia growth diameter on V8, 0.2xPDA and myro solid medium were assayed after 8 days at room temperature. (B) Same weight of mycelia from YEPD was transferred into myro liquid medium for constant shaking. Samples were collected after 7 days incubation in 100ml myro liquid medium. (C) qPCR study of *BRLA*, *WETA*, *ABAA* and *STUA* after 20 h incubation in YEPD liquid medium (D) 20 h samples in YEPD medium was studied the expression of exocyst-related and FvLcp1 gene expression. (E) WT,  $\Delta Fvsec4$  and  $\Delta Fvsec4$ -Com were crossed to M3120, an opposite mating type to assay fertility.

**Table S1.** Primers used in this study

| Primer  | Primer sequence (5'-3')                                                   | Application                                          |
|---------|---------------------------------------------------------------------------|------------------------------------------------------|
| UAF     | TTC CTG CTC CCT ATG GTG AT                                                | amplify <i>FvSEC4</i> 5' flank sequence              |
| AF1     | GTG AAT GTG GTT GCC AGA ATG C                                             | <u>amplify <i>FvSEC4</i> 5' flank/probe sequence</u> |
| AR1     | <u>TAG ATG CCG ACC GGG AAC</u><br>CGGGACTAATCCGTTTGC                      | <u>amplify <i>FvSEC4</i> 5' flank/probe sequence</u> |
| BF1     | <u>CCA CTA GCT CCA GCC AAG AGC</u> GGT CGT TGT<br>TGG AGT A               | <u>amplify <i>FvSEC4</i> 3' flank sequence</u>       |
| BR1     | CTC TTG ACC CGA TAC CTA ATC G                                             | amplify <i>FvSEC4</i> 3' flank sequence              |
| UAR     | GCC CTT CCT CCC TTT ATT TC                                                | amplify <i>FvSEC4</i> 3' flank sequence              |
| HYG/F   | TTG GCT GGA GCT AGT GGA GGT CAA                                           | amplify HY fragment                                  |
| HY/R    | GTA TTG ACC GAT TCC TTG CGG TCC GAA                                       | amplify HY fragment                                  |
| HYG/R   | GTT CCC GGT CGG CAT CTA CTC TAT                                           | amplify YG fragment                                  |
| YG/F    | GAT GTA GGA GGG CGT GGA TAT GTC CT                                        | amplify YG fragment                                  |
| OF      | AAT CGC ATC GCA CTG TTG TC                                                | <i>FvSEC4</i> ORF screening                          |
| OR      | AGC GCA TTG CTT TGT TGG                                                   | <i>FvSEC4</i> ORF screening                          |
| AF2     | TCA AGT ATC CCA TGC CAG TTC                                               | <u><i>FvSec4</i> complementation</u>                 |
| BR2     | TGG CTG AGG GCT TTG GTT                                                   | <u><i>FvSec4</i> complementation</u>                 |
| SEC4-PF | <u>GTC GAC GGT ATC GAT AAG CTT</u><br>TCA AGT ATC CCA TGC CAG TTC         | amplify <i>FvSEC4</i> promoter sequence              |
| SEC4-PR | <u>CTC GCC CTT GCT CAC CAT</u> GTT GAC CAA GAG<br>TGA GAG TAG C           | amplify <i>FvSEC4</i> promoter sequence              |
| GFP-F   | ATG GTG AGC AAG GGC GA                                                    | amplify GFP sequence                                 |
| GFP-R   | CTT GTA CAG CTC GTC CAT GC                                                | amplify GFP sequence                                 |
| ORF-F   | <u>CAC GGC ATG GAC GAG CTG TAC AAG</u><br>ATG TCG AGT AAT CGC AAC TAT GAT | amplify <i>FvSEC4</i> cDNA sequence                  |

|                   |                                                                  |                                            |
|-------------------|------------------------------------------------------------------|--------------------------------------------|
| ORF-R             | <u>GGA CTC CTT AGG GTA TTC GGT</u> TTA GCA GCA CTT<br>GCT        | amplify FvSEC4 cDNA<br>sequence            |
| Ter-F             | ACC GAA TAC CCT AAG GAG TCC                                      | amplify <i>FvSEC4</i> terminal<br>sequence |
| Ter-R             | <u>TCA GTA ACG TTA AGT GGA TCC</u> TAT GAC GGA<br>GGA GAC GAG GT | amplify <i>FvSEC4</i> terminal<br>sequence |
| FvBrlA-qpcr-F1    | CGT CAC AAG CAA ACT TTC CAC GGT                                  | qPCR analysis                              |
| FvBrlA-qpcr-R1    | CGT GTA GCT TGC GGT GGT TGT T                                    | qPCR analysis                              |
| FvwetA-qpcr-F1    | GGC ATC CAC ACA CCA GCA GAA T                                    | qPCR analysis                              |
| FvwetA-qpcr-R1    | GAT GCT GCC AAG CTG ACT GAG GA                                   | qPCR analysis                              |
| FvAbaA-qpcr-F1    | TAC CGC AAC CGA CAA GCA CAC AA                                   | qPCR analysis                              |
| FvAbaA-qpcr-R1    | GTG AGG CAT GAG AAG AAC AGA GTC AAC A                            | qPCR analysis                              |
| FvStuA-qpcr-F1    | TGT AGC ACG GAG AGA AGA TAA CCA CAT GA                           | qPCR analysis                              |
| FvStuA-qpcr-R1    | ATC TTG ACG ACG TGG CGA ACC TTT                                  | qPCR analysis                              |
| FvEXO70-qpcr-F1   | GCT CTA GAT GAA GAA GCA AGG GCT GA                               | qPCR analysis                              |
| FvExo70-qpcr-R1   | ATC AAC GTT ATT TCC CAA TAT CTG CAG TCG                          | qPCR analysis                              |
| FvSec5-qPCR-F1    | TGA AGA AGA CGG AGG ACG ACT GGT TAA T                            | qPCR analysis                              |
| FvSec5-qPCR-R1    | CGA ATG TTT CTA TCC CCT GAG TCC AAT GC                           | qPCR analysis                              |
| Syn1-qpcr-F1      | CCC TCG TCG TTC AGC AAG AA                                       | qPCR analysis                              |
| Syn1-qpcr-R1      | AGC AAC ACA AAT ACC CAA GCA G                                    | qPCR analysis                              |
| Lcp1-qpcr-F1      | TAT GGA CCT GAG GAG GAC GAA TG                                   | qPCR analysis                              |
| Lcp1-qpcr-R1      | CAC CAA AGG TAC TCC CAG CAA TC                                   | qPCR analysis                              |
| FVEG_Sec4_qPCR_F1 | GTG CGA CTG GGA GGA GAA GCG                                      | qPCR analysis                              |
| FVEG_Sec4_qPCR_R1 | GCT GAG GGT TGG TCG TTC TTG G                                    | qPCR analysis                              |
| Tub2-F            | CAG CGT TCC TGA GTT GAC CCA ACA G                                | qPCR analysis                              |
| Tub2-R            | CTG GAC GTT GCG CAT CTG ATC CTC G                                | qPCR analysis                              |
